# Supplementary material for: Dansyl-carbazole AIEE material for selective recognition of thiourea derivatives
Source: Royal Society of Chemistry journal article supplement (doi:10.1039/c4nj01800a), 2014-12-09
Supplement: c4nj01800a1.pdf [file c4nj01800a1.pdf]

## **-Supporting Information**

### **Dansyl-Carbazole AIEE Material for Selective Recognition of Thiourea Derivatives**

Shilpa Sharma, Chullikkattil P. Pradeep and Abhimanew Dhir\*

Indian Institute of Technology, Mandi, Himachal Pradesh, India, 175001

|            |                                                                                  |
|------------|----------------------------------------------------------------------------------|
| <b>S2</b>  | General information                                                              |
| <b>S3</b>  | <sup>1</sup> H NMR Spectrum of compound <b>DACB</b>                              |
| <b>S4</b>  | <sup>13</sup> C NMR Spectrum of compound <b>DACB</b>                             |
| <b>S5</b>  | Mass Spectrum of compound <b>DACB</b>                                            |
| <b>S6</b>  | IR Spectrum of compound <b>DACB</b>                                              |
| <b>S7</b>  | Fluorescence emission spectra of <b>DACB</b> in presence of thioureas and ureas. |
| <b>S8</b>  | Detection limit of compound <b>DACB</b>                                          |
| <b>S9</b>  | Stern volmer plot of compound <b>DACB</b>                                        |
| <b>S10</b> | Crystal and refinement data of <b>DACB</b> .                                     |

## General Information

All reagents were purchased from Sigma Aldrich and were used without further purification. THF and H<sub>2</sub>O (buffered to pH 7.1 ) was used to perform analytical studies. All the fluorescence spectra were recorded on Agilent Technologies Cary Eclipse fluorescence spectrometer. UV-Vis spectra were recorded on Shimadzu UV-2450 spectrophotometer and FT-IR spectra were recorded on PerkinElmer FT-IR spectrometer (Spectrum Two, Serial No:88689). <sup>1</sup>H and <sup>13</sup>C NMR spectra were recorded on jeol 500 NMR spectrometer using CDCl<sub>3</sub> as solvent and TMS as internal standard. Data are presented as follows: chemical shift in ppm (δ), multiplicity (s = singlet, d= doublet, br = broad singlet, m = multiplet), coupling constant, *J* (Hz). TEM characterization was done by using FEI TECNAI G<sup>2</sup> 20 –TWIN 200KV high resolution transmission electron microscopy (HRTEM). SEM characterization was done by using FEI-Nova nano SEM -450.

## Preparation of HEPES Solution of pH = 7.1

To prepare 1 L HEPES buffer of 7.1 pH add 11.92 g of HEPES, 13.1 ml of 1M NaOH and 86.9 ml of 1 M NaCl and dilute it to 1L by adding distilled water. <sup>R1</sup>

**R1- Buffers for pH and Metal Ion Control, D. Perrin, B. Dernpsey, John Wiley and Sons, New York, 1974.**

## Quantum yield

### Experimental Procedure

Fluorescence quantum yield of **DACB** was determined at using quinine sulphate ( $\Phi_{F(R)} = 0.546$ ) in 1N H<sub>2</sub>SO<sub>4</sub> as standard. An excitation wavelength of 352 nm from a xenon spectrofluorophotometer was used. The quantum yield was calculated by using equation (1), in which  $\Phi_{F(S)}$  is the radiative quantum yield of sample,  $\Phi_{F(R)}$  is the radiative quantum yield of reference,  $A_R$  and  $A_S$  are the absorbance of sample and the reference, respectively,  $F_R$  and  $F_S$  the area of emission for sample and the reference, respectively,  $n_R$  and  $n_S$  are the refractive indices of the sample and reference solutions.

### Equation 1

$$\Phi_{F(S)} = (A_R / A_S) (F_S / F_R) (n_S / n_R) \Phi_{F(R)}$$

# <sup>1</sup>H NMR SPECTRUM OF DACB

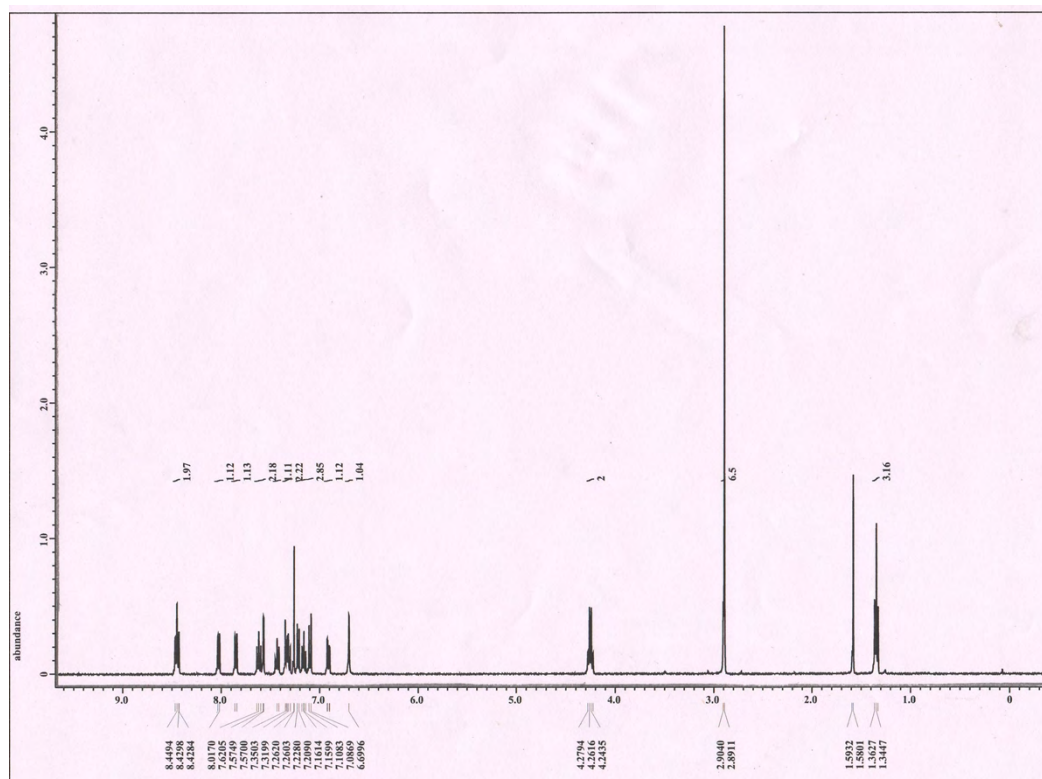

# <sup>13</sup>C NMR SPECTRUM OF DACB

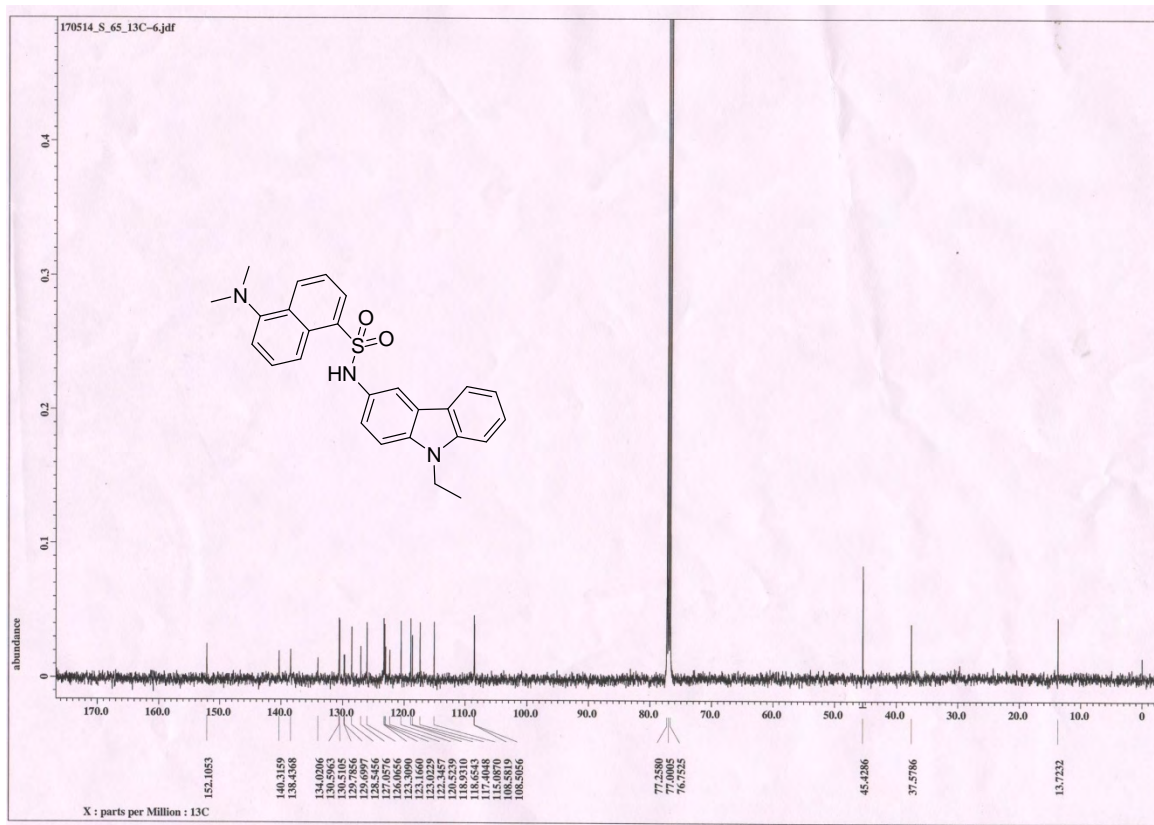

# MASS SPECTRUM OF DACB

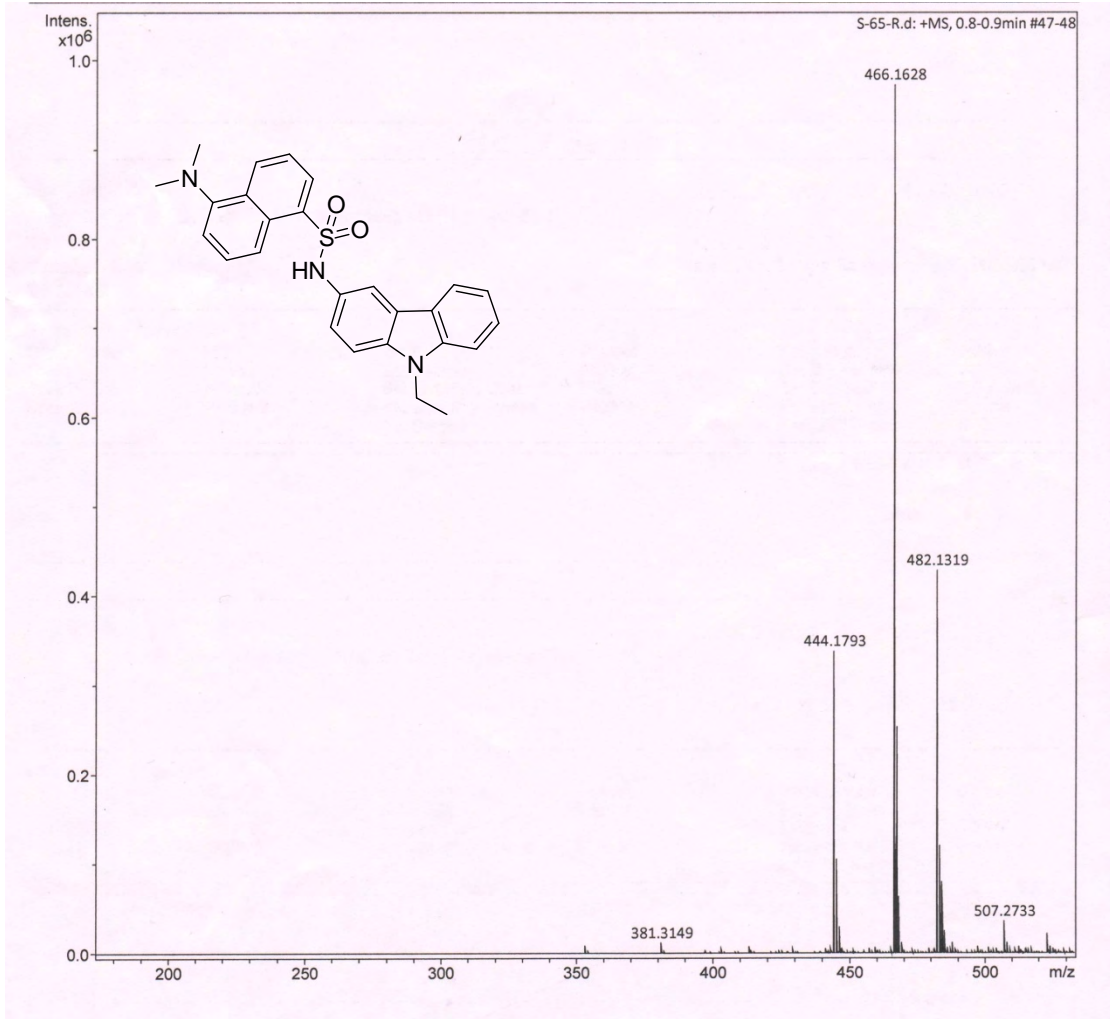

# IR SPECTRUM OF DACB

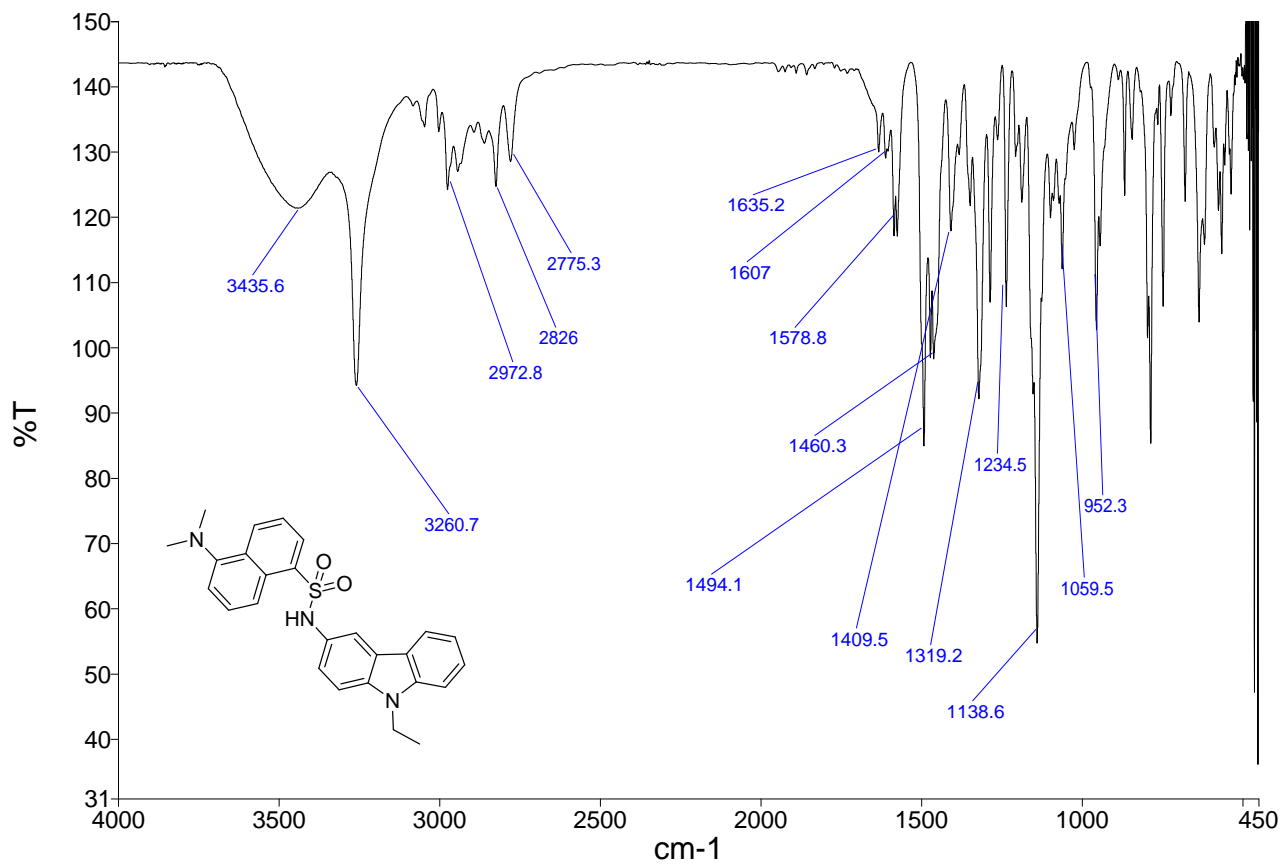

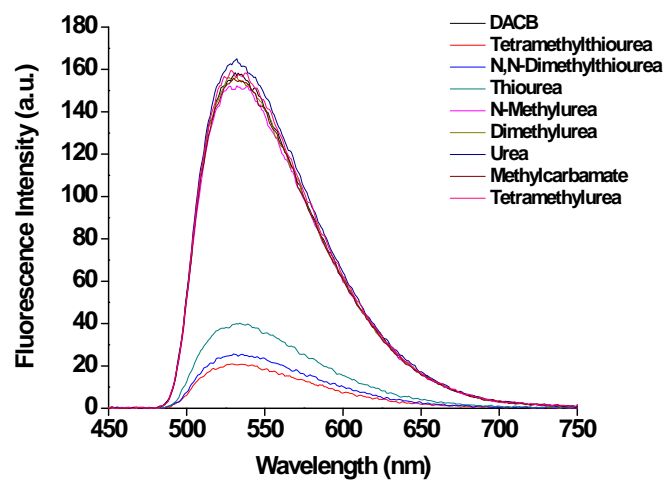

**Fig 1.** Fluorescence emission spectra of **DACB** (1.0 μM) in H<sub>2</sub>O:THF (60:40, v/v) in presence of thioureas and ureas.

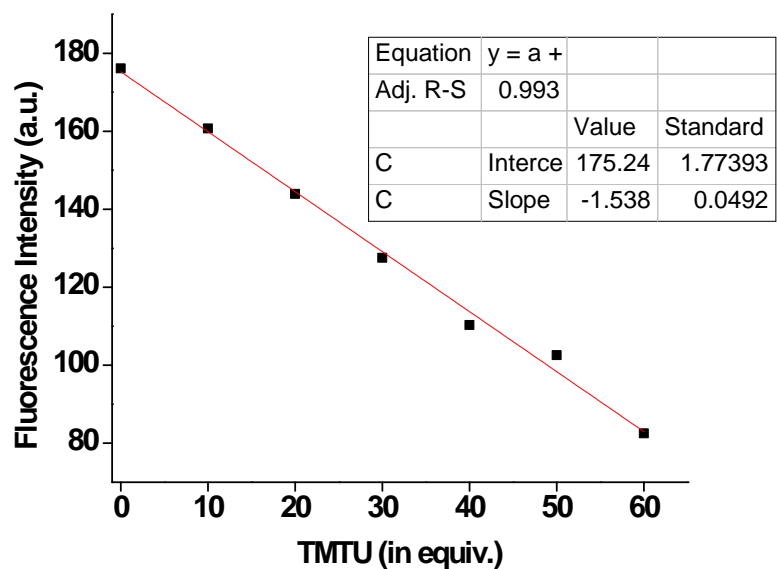

**Fig 2.** Detection limit of compound **DACB** showing the fluorescence intensity at 530 nm as a function of tetramethylthiourea concentration

| S.no. | DACB+analyte                        | $\sigma$ | M      | $3 \sigma/M$          | Detection Limit |
|-------|-------------------------------------|----------|--------|-----------------------|-----------------|
| 1.    | <b>DACB+</b><br>Tetramethylthiourea | 0.79     | -1.538 | $1.54 \times 10^{-6}$ | 1.54 $\mu$ M    |



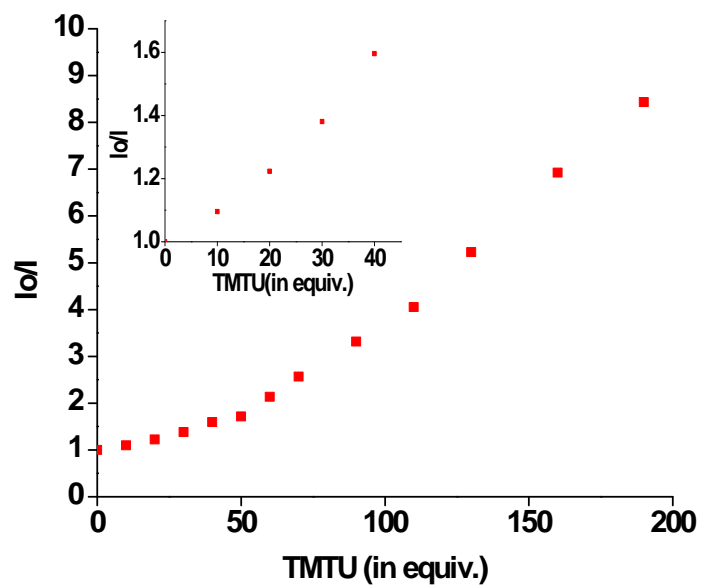

**Fig. 3.** Stern–Volmer plot of fluorescence response of **DACB** to tetramethylthiourea. Inset figure shows the Stern–Volmer plot obtained at lower concentration of tetramethylthiourea

## X-ray crystallography

Single crystal X-ray data were collected with Agilent SuperNova, equipped with multilayer optics monochromated dual source (Cu and Mo) and Eos CCD detector, using Mo-K $\alpha$  (0.71073 Å) radiation. Data acquisition and reduction were made using the program CrysAlisPRO.<sup>R2</sup> The structure was solved with ShelXS<sup>R3</sup> program and refined on  $F^2$  by full matrix least-squares techniques with ShelXL<sup>R3</sup> program in Olex<sup>2</sup> (v.1.2) program package.<sup>R4</sup> Anisotropic displacement parameters were applied for all atoms, except hydrogen atoms. H atoms were calculated into their positions or located from the electron density map and refined as riding atoms using isotropic displacement parameters. The crystal and refinement data are summarized in Table 1. CCDC 1009952 contains the supplementary crystallographic data for this paper. These data can be obtained free of charge from The Cambridge Crystallographic Data Centre via [www.ccdc.cam.ac.uk/data\\_request/cifdata](http://www.ccdc.cam.ac.uk/data_request/cifdata).

R2 : CrysAlisPro Program, version171.37.33c; Agilent Technologies:Oxford, 2012.

R3 : G. M. Sheldrick, *ActaCrystallogr.*, 2008, **A 64**, 112.

R4 : O. V. Dolomanov, L. J. Bourhis, R. J. Gildea, J. A. K. Howard, H. J. Puschmann, *Appl. Crystallogr.*, 2009, **42**, 339.

Crystal data and structure refinement for **DACB**

|                                          |                                                                 |                                                |
|------------------------------------------|-----------------------------------------------------------------|------------------------------------------------|
| Empirical formula                        | C <sub>26</sub> H <sub>25</sub> N <sub>3</sub> O <sub>2</sub> S |                                                |
| Formula weight                           | 443.55                                                          |                                                |
| Temperature                              | 293(2) K                                                        |                                                |
| Wavelength                               | 0.71073 Å                                                       |                                                |
| Crystal system                           | Monoclinic                                                      |                                                |
| Space group                              | <i>P</i> 21/ <i>c</i>                                           |                                                |
| Unit cell dimensions                     | <i>a</i> = 15.635(5) Å                                          | <i>b</i> = 16.268(5) Å <i>β</i> = 103.891(5)°. |
|                                          | <i>c</i> = 8.895(5) Å                                           |                                                |
| Volume                                   | 2196.3(16) Å <sup>3</sup>                                       |                                                |
| Z                                        | 4                                                               |                                                |
| Density (calculated)                     | 1.341 Mg/m <sup>3</sup>                                         |                                                |
| Absorption coefficient                   | 0.177 mm <sup>-1</sup>                                          |                                                |
| F(000)                                   | 936                                                             |                                                |
| Theta range for data collection          | 1.835 to 25.650°.                                               |                                                |
| Index ranges                             | -19 ≤ <i>h</i> ≤ 15, -19 ≤ <i>k</i> ≤ 17, -10 ≤ <i>l</i> ≤ 10   |                                                |
| Reflections collected                    | 20886                                                           |                                                |
| Independent reflections                  | 4145 [R(int) = 0.0173]                                          |                                                |
| Completeness to theta = 25.242°          | 99.8 %                                                          |                                                |
| Refinement method                        | Full-matrix least-squares on <i>F</i> <sup>2</sup>              |                                                |
| Data / restraints / parameters           | 4145 / 0 / 389                                                  |                                                |
| Goodness-of-fit on <i>F</i> <sup>2</sup> | 1.064                                                           |                                                |
| Final R indices [I > 2σ(I)]              | R1 = 0.0307, wR2 = 0.0773                                       |                                                |
| R indices (all data)                     | R1 = 0.0326, wR2 = 0.0787                                       |                                                |
| Extinction coefficient                   | n/a                                                             |                                                |
| Largest diff. peak and hole              | 0.290 and -0.366 e.Å <sup>-3</sup>                              |                                                |

Table 4. Bond lengths [ $\text{\AA}$ ] and angles [ $^\circ$ ] for test list 21.

---

|              |            |                |            |
|--------------|------------|----------------|------------|
| S(1)-O(1)    | 1.4306(9)  | N(3)-C(25)     | 1.4514(19) |
| S(1)-O(2)    | 1.4425(12) | C(3)-H(3)      | 0.956(17)  |
| S(1)-N(2)    | 1.6248(11) | C(16)-C(17)    | 1.396(2)   |
| S(1)-C(6)    | 1.7745(13) | C(16)-C(21)    | 1.4107(19) |
| N(1)-C(1)    | 1.4108(17) | C(16)-C(15)    | 1.4452(19) |
| N(1)-C(12)   | 1.4492(19) | C(13)-C(24)    | 1.4038(18) |
| N(1)-C(11)   | 1.458(2)   | C(23)-C(22)    | 1.386(2)   |
| C(8)-C(9)    | 1.3644(19) | C(23)-C(24)    | 1.387(2)   |
| C(8)-C(7)    | 1.4059(19) | C(23)-H(23)    | 0.977(17)  |
| C(8)-H(8)    | 0.960(16)  | C(15)-C(22)    | 1.4101(19) |
| C(6)-C(7)    | 1.3729(18) | C(24)-H(24)    | 0.979(17)  |
| C(6)-C(5)    | 1.4299(18) | C(17)-C(18)    | 1.386(2)   |
| C(14)-C(13)  | 1.3813(19) | C(17)-H(17)    | 0.963(19)  |
| C(14)-C(15)  | 1.3934(19) | C(7)-H(7)      | 0.968(15)  |
| C(14)-H(14)  | 0.942(16)  | C(11)-H(11C)   | 0.983(18)  |
| C(9)-C(10)   | 1.4151(18) | C(11)-H(11B)   | 0.99(2)    |
| C(9)-H(9)    | 0.956(16)  | C(11)-H(11A)   | 0.98(2)    |
| N(2)-C(13)   | 1.4302(16) | C(20)-C(19)    | 1.384(3)   |
| N(2)-NH2     | 0.832(18)  | C(20)-C(21)    | 1.395(2)   |
| C(1)-C(2)    | 1.3722(19) | C(20)-H(20)    | 0.976(18)  |
| C(1)-C(10)   | 1.4360(18) | C(18)-C(19)    | 1.395(3)   |
| C(10)-C(5)   | 1.4291(17) | C(18)-H(18)    | 0.96(2)    |
| C(12)-H(12C) | 0.973(19)  | C(26)-C(25)    | 1.504(3)   |
| C(12)-H(12B) | 0.995(19)  | C(26)-H(26C)   | 0.99(2)    |
| C(12)-H(12A) | 0.980(19)  | C(26)-H(26A)   | 1.02(2)    |
| C(2)-C(3)    | 1.4071(19) | C(26)-H(26B)   | 0.95(3)    |
| C(2)-H(2)    | 0.963(17)  | C(19)-H(19)    | 0.99(2)    |
| C(5)-C(4)    | 1.4163(17) | C(25)-H(25B)   | 0.98(2)    |
| C(4)-C(3)    | 1.3673(19) | C(25)-H(25A)   | 1.02(2)    |
| C(4)-H(4)    | 0.940(16)  |                |            |
| N(3)-C(21)   | 1.383(2)   | O(1)-S(1)-O(2) | 118.59(5)  |
| N(3)-C(22)   | 1.3851(18) | O(1)-S(1)-N(2) | 104.91(6)  |
|              |            | O(2)-S(1)-N(2) | 108.09(6)  |

|                     |            |                   |            |
|---------------------|------------|-------------------|------------|
| O(1)-S(1)-C(6)      | 110.03(6)  | C(4)-C(5)-C(10)   | 118.87(11) |
| O(2)-S(1)-C(6)      | 105.66(5)  | C(4)-C(5)-C(6)    | 124.26(11) |
| N(2)-S(1)-C(6)      | 109.36(6)  | C(10)-C(5)-C(6)   | 116.84(10) |
| C(1)-N(1)-C(12)     | 116.57(12) | C(3)-C(4)-C(5)    | 120.07(12) |
| C(1)-N(1)-C(11)     | 115.75(11) | C(3)-C(4)-H(4)    | 119.7(9)   |
| C(12)-N(1)-C(11)    | 111.51(11) | C(5)-C(4)-H(4)    | 120.2(9)   |
| C(9)-C(8)-C(7)      | 120.02(12) | C(21)-N(3)-C(22)  | 108.41(11) |
| C(9)-C(8)-H(8)      | 120.1(9)   | C(21)-N(3)-C(25)  | 126.30(13) |
| C(7)-C(8)-H(8)      | 119.8(9)   | C(22)-N(3)-C(25)  | 124.94(13) |
| C(7)-C(6)-C(5)      | 121.86(11) | C(4)-C(3)-C(2)    | 121.40(12) |
| C(7)-C(6)-S(1)      | 115.99(9)  | C(4)-C(3)-H(3)    | 119.9(10)  |
| C(5)-C(6)-S(1)      | 122.03(9)  | C(2)-C(3)-H(3)    | 118.7(10)  |
| C(13)-C(14)-C(15)   | 118.79(12) | C(17)-C(16)-C(21) | 120.02(13) |
| C(13)-C(14)-H(14)   | 120.3(10)  | C(17)-C(16)-C(15) | 133.58(13) |
| C(15)-C(14)-H(14)   | 120.9(10)  | C(21)-C(16)-C(15) | 106.40(12) |
| C(8)-C(9)-C(10)     | 121.29(12) | C(14)-C(13)-C(24) | 121.22(12) |
| C(8)-C(9)-H(9)      | 121.3(9)   | C(14)-C(13)-N(2)  | 117.51(11) |
| C(10)-C(9)-H(9)     | 117.3(9)   | C(24)-C(13)-N(2)  | 121.22(12) |
| C(13)-N(2)-S(1)     | 125.60(9)  | C(22)-C(23)-C(24) | 118.69(13) |
| C(13)-N(2)-NH2      | 115.2(11)  | C(22)-C(23)-H(23) | 122.1(10)  |
| S(1)-N(2)-NH2       | 111.1(11)  | C(24)-C(23)-H(23) | 119.2(10)  |
| C(2)-C(1)-N(1)      | 123.15(12) | C(14)-C(15)-C(22) | 119.81(12) |
| C(2)-C(1)-C(10)     | 119.11(12) | C(14)-C(15)-C(16) | 133.62(12) |
| N(1)-C(1)-C(10)     | 117.67(11) | C(22)-C(15)-C(16) | 106.56(12) |
| C(9)-C(10)-C(5)     | 119.56(11) | C(23)-C(24)-C(13) | 120.31(13) |
| C(9)-C(10)-C(1)     | 120.84(11) | C(23)-C(24)-H(24) | 120.5(10)  |
| C(5)-C(10)-C(1)     | 119.51(11) | C(13)-C(24)-H(24) | 119.2(10)  |
| N(1)-C(12)-H(12C)   | 112.9(11)  | N(3)-C(22)-C(23)  | 129.67(13) |
| N(1)-C(12)-H(12B)   | 109.4(10)  | N(3)-C(22)-C(15)  | 109.22(12) |
| H(12C)-C(12)-H(12B) | 110.2(15)  | C(23)-C(22)-C(15) | 121.10(13) |
| N(1)-C(12)-H(12A)   | 107.5(11)  | C(18)-C(17)-C(16) | 118.58(15) |
| H(12C)-C(12)-H(12A) | 106.9(15)  | C(18)-C(17)-H(17) | 121.7(11)  |
| H(12B)-C(12)-H(12A) | 109.8(15)  | C(16)-C(17)-H(17) | 119.7(11)  |
| C(1)-C(2)-C(3)      | 120.82(12) | C(6)-C(7)-C(8)    | 120.06(12) |
| C(1)-C(2)-H(2)      | 118.8(10)  | C(6)-C(7)-H(7)    | 119.0(9)   |
| C(3)-C(2)-H(2)      | 120.4(10)  | C(8)-C(7)-H(7)    | 120.9(9)   |

|                     |            |                     |            |
|---------------------|------------|---------------------|------------|
| N(1)-C(11)-H(11C)   | 113.0(10)  | H(26C)-C(26)-H(26A) | 110.0(18)  |
| N(1)-C(11)-H(11B)   | 111.8(11)  | C(25)-C(26)-H(26B)  | 108.5(15)  |
| H(11C)-C(11)-H(11B) | 105.6(15)  | H(26C)-C(26)-H(26B) | 105(2)     |
| N(1)-C(11)-H(11A)   | 108.1(11)  | H(26A)-C(26)-H(26B) | 110.9(19)  |
| H(11C)-C(11)-H(11A) | 108.7(15)  | C(20)-C(19)-C(18)   | 122.05(15) |
| H(11B)-C(11)-H(11A) | 109.5(15)  | C(20)-C(19)-H(19)   | 119.0(12)  |
| C(19)-C(20)-C(21)   | 117.33(15) | C(18)-C(19)-H(19)   | 118.9(12)  |
| C(19)-C(20)-H(20)   | 120.7(11)  | N(3)-C(25)-C(26)    | 112.35(16) |
| C(21)-C(20)-H(20)   | 121.9(11)  | N(3)-C(25)-H(25B)   | 108.1(12)  |
| N(3)-C(21)-C(20)    | 129.26(14) | C(26)-C(25)-H(25B)  | 109.7(12)  |
| N(3)-C(21)-C(16)    | 109.37(12) | N(3)-C(25)-H(25A)   | 108.0(12)  |
| C(20)-C(21)-C(16)   | 121.37(14) | C(26)-C(25)-H(25A)  | 110.0(12)  |
| C(17)-C(18)-C(19)   | 120.63(16) | H(25B)-C(25)-H(25A) | 108.6(17)  |
| C(17)-C(18)-H(18)   | 118.6(12)  |                     |            |
| C(19)-C(18)-H(18)   | 120.7(12)  |                     |            |
| C(25)-C(26)-H(26C)  | 112.3(13)  |                     |            |
| C(25)-C(26)-H(26A)  | 109.8(13)  |                     |            |

---

Symmetry transformations used to generate equivalent atoms:

Table 9. Hydrogen bonds for test It s 21 [ $\text{\AA}$  and  $^\circ$ ].

| D-H...A            | d(D-H)    | d(H...A)  | d(D...A)   | $\angle(\text{DHA})$ |
|--------------------|-----------|-----------|------------|----------------------|
| C(24)-H(24)...O(2) | 0.979(17) | 2.485(16) | 3.1670(19) | 126.5(12)            |
| N(2)-NH2...O(2)#1  | 0.832(18) | 2.112(18) | 2.9417(17) | 175.0(16)            |

Symmetry transformations used to generate equivalent atoms:

#1 x, -y+1/2, z+1/2
